# Supplementary material
Source: publisher figshare collection journal article supplement (https://tandf.figshare.com/ndownloader/files/20779737)
Supplement: Supplementary file 1 [file 20779737]

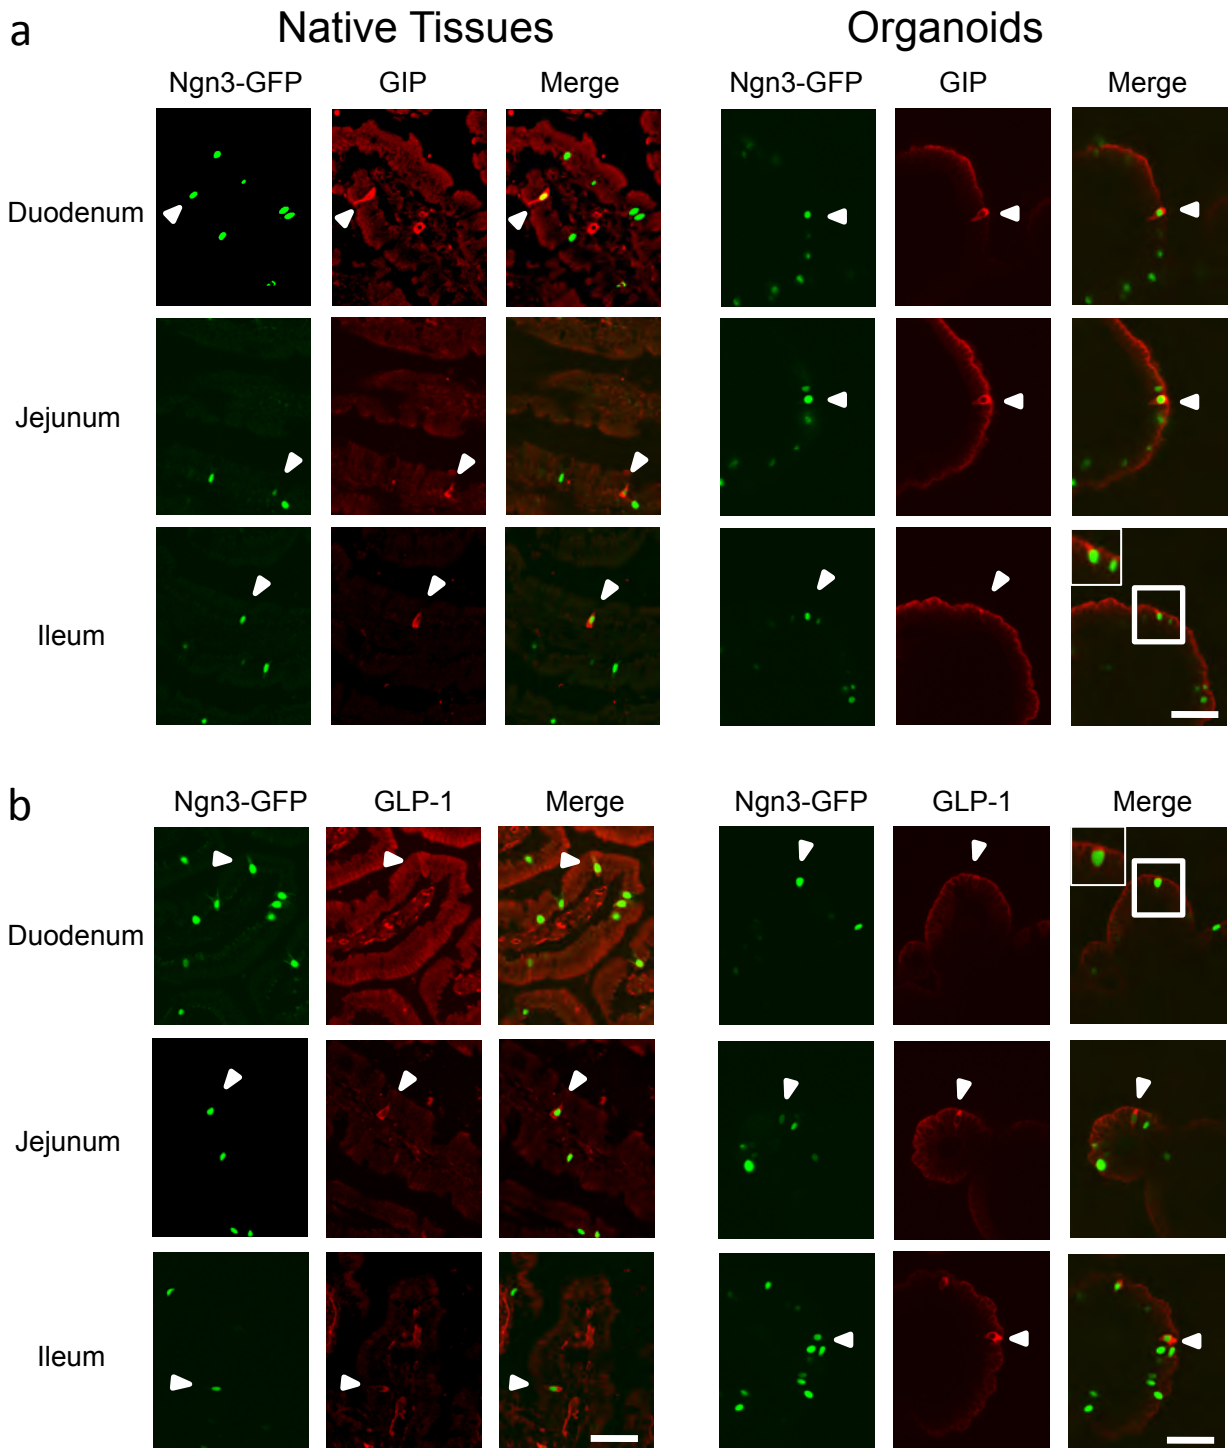

**Supplementary Figure 1**

Merged images from Fig. 2 with their single fluorescent images. Scale bar: 50  $\mu$ m

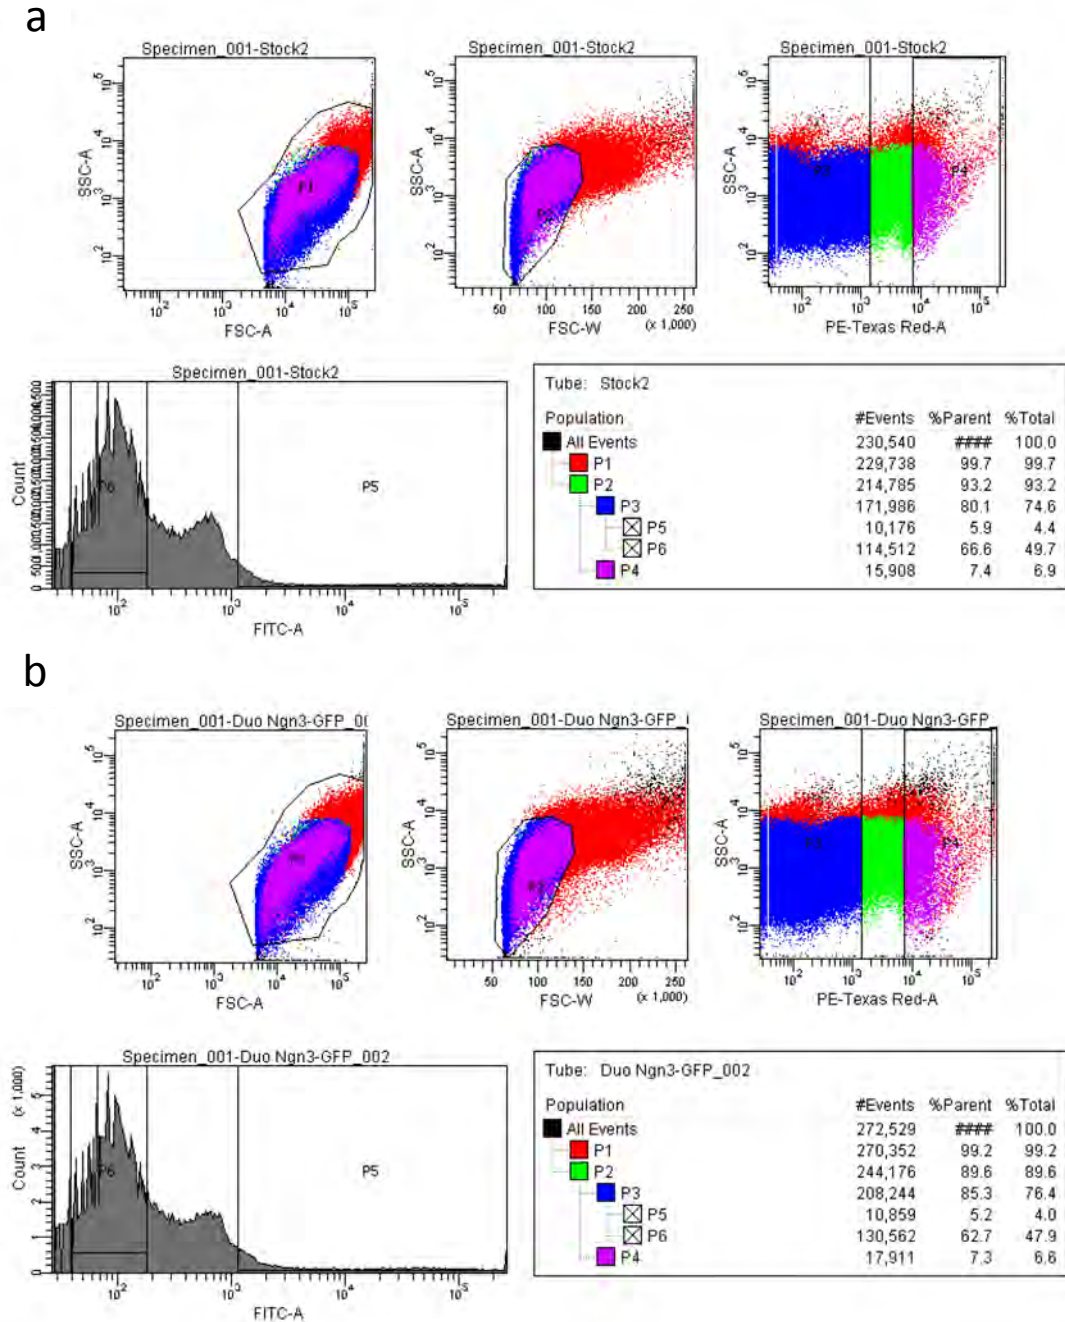

### Supplementary Figure 2

Ngn3-EGFP-marked cell sorting of intestinal organoids from jejunum (a) and duodenum (b). All cell populations were initially gated through a forward scatter area (FSC-A) versus side scatter area (SSC-A). Doublets/multiplets and dead cells were eliminated by P2-P4 gating and subsequently singlet live cells (P3) were gated based on Ngn3-EGFP expression. Only 4.0%–4.4% of total cells from organoids was purified as EGFP-positive cells.

## Duodenum

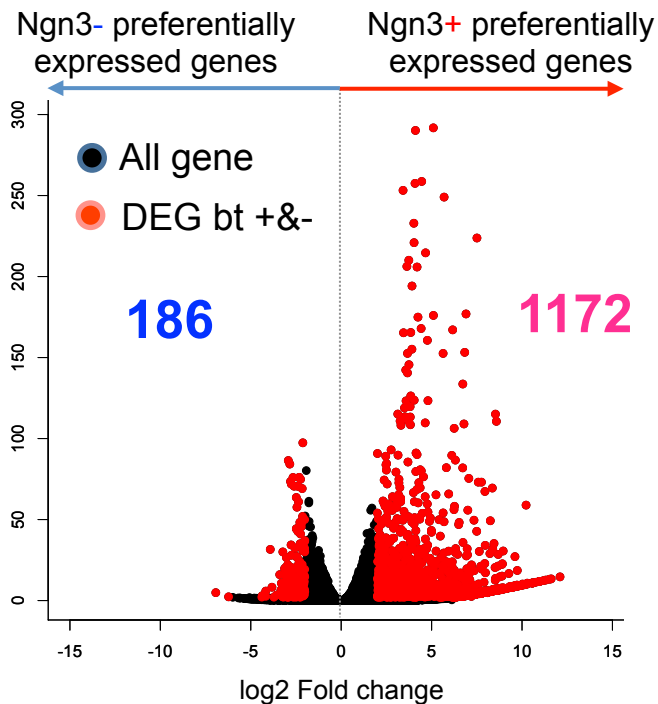

## Jejunum

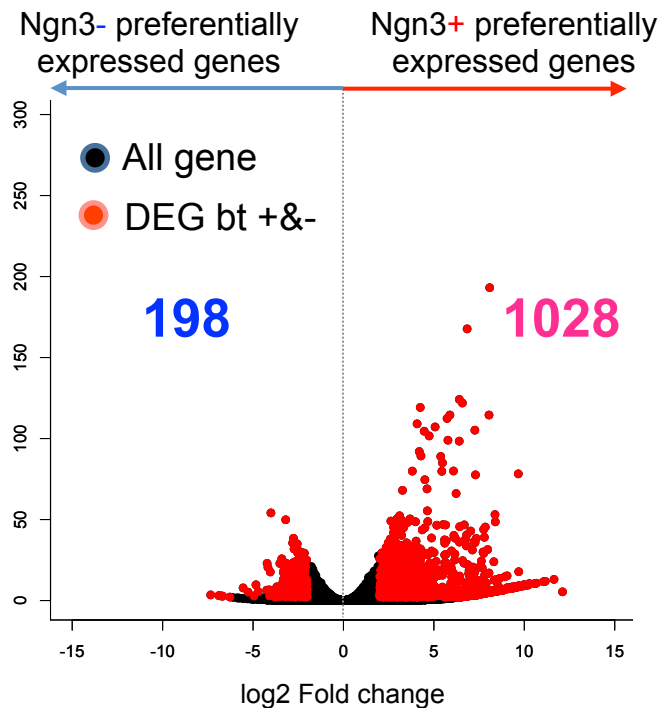

### Supplementary Figure 3 (Modified volcano plot analysis from Figure 3)

Ngn3+ preferentially expressed and non-expressed genes were marked in red.

(Fold change  $\geq 2$ , *padj*  $\leq 0.01$ , Binominal (Wald) test with Benjamin-Hochberg correction).

$-\log_{10}(p \text{ value})$

Duodenum

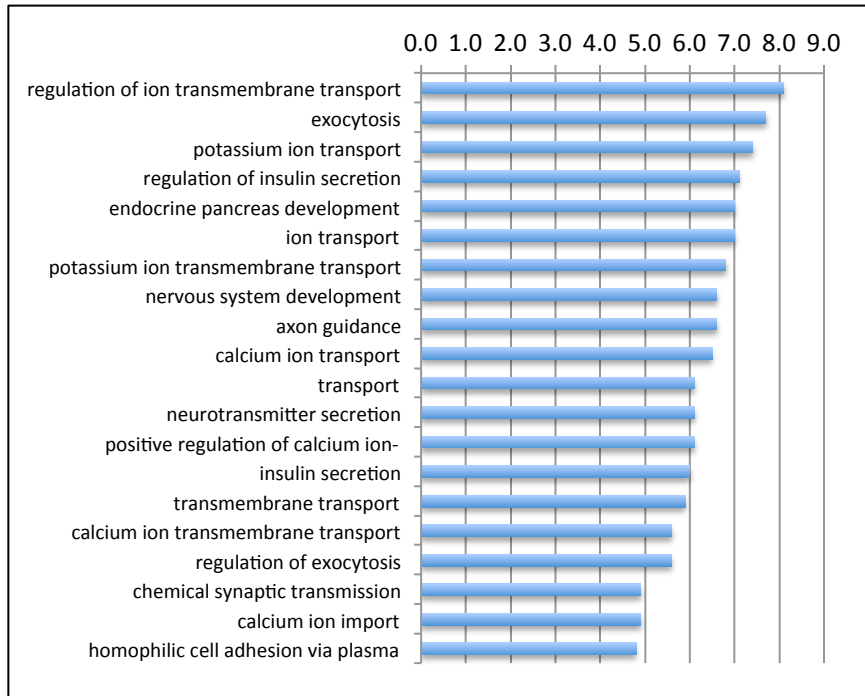

Jejunum

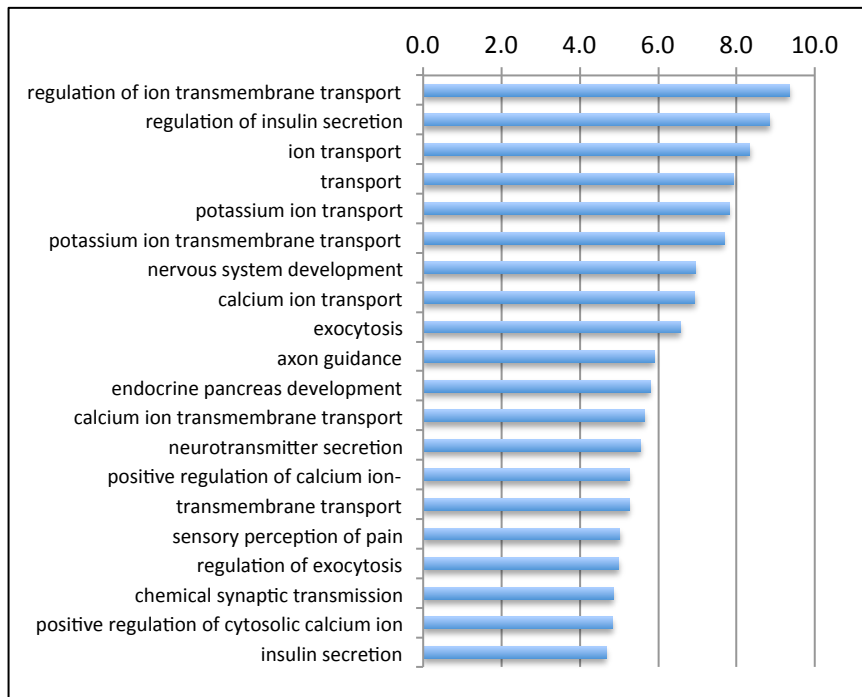

GO terms enriched in GFP+ fraction

#### Supplementary Figure 4

The top 20 GO terms from the preferentially expressed genes screened from the Ngn3+ cell population.  $-\log_{10}(P \text{ value})$  is the negative log10 of the  $P$  value.

RT-PCR primer

| Gene         | Forward 5'→3'        | Reverse 5'→3'          |
|--------------|----------------------|------------------------|
| <i>G3pdh</i> | ACCACAGTCCATGCCATCAC | TCCACCACCCTGTTGCTGTA   |
| <i>Ghrl</i>  | GACAAGCAGAAGAGACAGAG | TCTTCCCAGAGGATATCCTG   |
| <i>Cck</i>   | TAGCGCGATACATCCAGCAG | GGTCACTTATTCTATGGCTGGG |
| <i>Gip</i>   | CCTGCTCTCTGTTGCTGGTG | CTGCGTACCTTGGACCTC     |
| <i>Sct</i>   | CGAACACTCAGACCCTACAG | CAGTCCACTCTGAACGATCAA  |
| <i>Gcg</i>   | GCTTATAATGCTGGTGCAAG | TTCATCTCATCAGGGTCCTC   |

**Supplementary Table 1**

Primer sets used for RT-PCR in the study.
